# Supplementary material for: The construction of a biomass component interaction model based on research into the hydrothermal liquefaction of sewage sludge
Source: Royal Society of Chemistry journal article supplement (doi:10.1039/d3ra03809b), 2023-01-01
Supplement: d3ra03809b1.pdf [file d3ra03809b1.pdf]

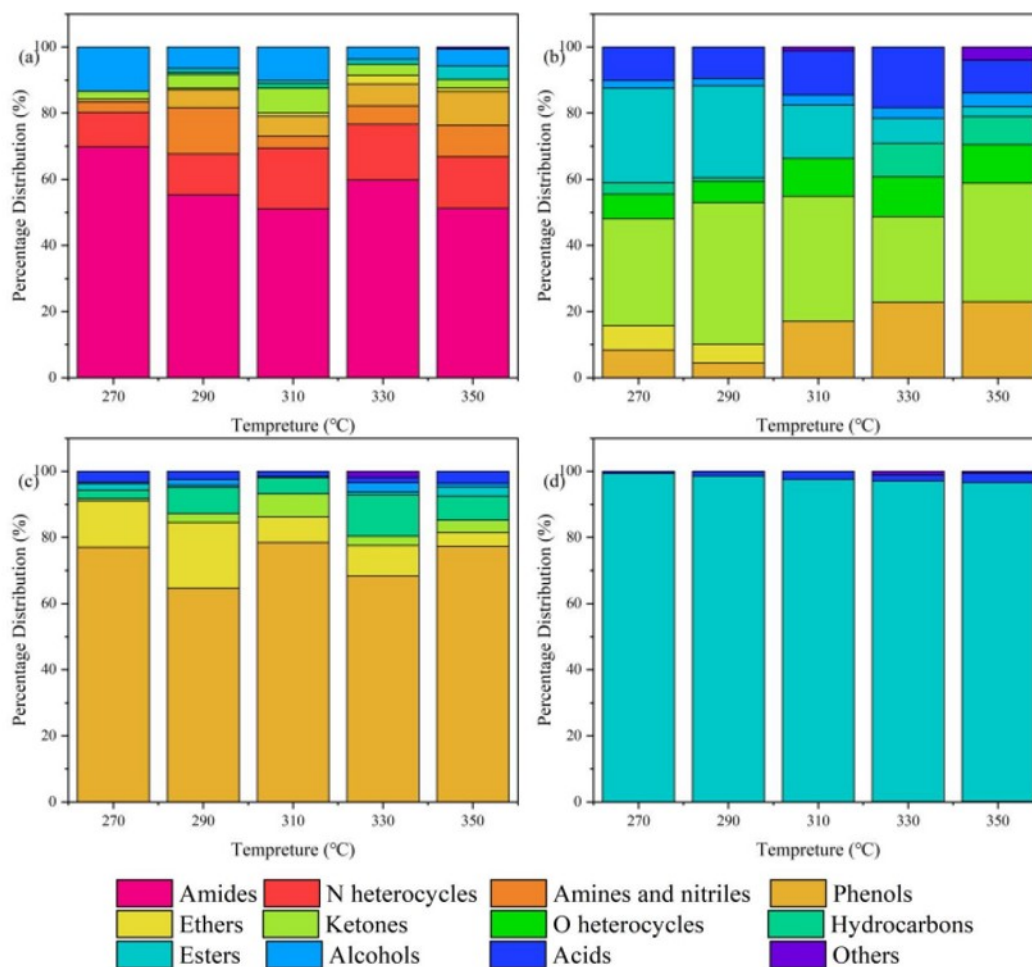

Figure S1 Total Ion Chromatogram area % for different compound classes in oil from HTL (30 min, 270, 290, 310, 330, 350 °C) of (a) egg white protein, (b) cellulose, (c) alkaline lignin, and (d) glycerol tristearate tentatively identified by GC/MS

Table S1 Feedstocks, biochemical compositions used in the models, and HTL conditions used in published HTL studies

| Feedstocks                         | Temp.<br>(°C) | Time<br>(min) | Composition (%) |                |        |       | Experimental<br>oil yield (%) | Predicted<br>oil yield (%) | Reference |
|------------------------------------|---------------|---------------|-----------------|----------------|--------|-------|-------------------------------|----------------------------|-----------|
|                                    |               |               | Protein         | Polysaccharide | Lignin | Lipid |                               |                            |           |
| Anaerobic sludge                   | 300           | 30            | 15              | 54             | 10     | 1     | 9.4                           | 10.92                      | 1         |
| Swine manure                       | 350           | 30            | 25              | 14             | 3      | 22    | 30.2                          | 27.92                      | 1         |
| Microalgae                         | 300           | 10            | 42              | 54             | 1      | -     | 10                            | 22.05                      | 1         |
| Swine manure                       | 340           | 30            | 17.1            | 35.02          | 0.88   | 4.86  | 24.2                          | 16.67                      | 2         |
| Swine manure                       | 260           | 30            | 17.1            | 35.02          | 0.88   | 4.86  | 14.9                          | 11.69                      | 2         |
| Swine manure                       | 340           | 30            | 21.89           | 38.29          | 4.46   | 8.81  | 25.58                         | 23.79                      | 3         |
| Swine manure                       | 340           | 60            | 21.89           | 38.29          | 4.46   | 8.81  | 22.26                         | 22.90                      | 3         |
| microalgae-pine<br>wood-sugar pulp | 350           | 10            | 6               | 69             | 14     | -     | 20                            | 17.67                      | 4         |
| microalgae-pine<br>wood-sugar pulp | 350           | 10            | 22              | 45             | 14     | 7     | 29                            | 26.2                       | 4         |
| microalgae-pine<br>wood-sugar pulp | 350           | 10            | 18              | 57             | 9      | 5     | 22                            | 24.76                      | 4         |
| Spirulina-Spartina<br>alterniflora | 300           | 30            | 35              | 45             | 6      | 3     | 27                            | 23.45                      | 5         |
| Spirulina-Spartina<br>alterniflora | 350           | 30            | 53              | 35             | 3      | 4     | 43                            | 32.13                      | 5         |
| Livestock waste                    | 340           | 15            | 17              | 35             | 1      | 5     | 24                            | 16.72                      | 6         |
| algae mix-swine<br>manure          | 300           | 60            | 27              | 22             | 6      | 7     | 24                            | 17.42                      | 7         |
| algae mix-swine<br>manure          | 300           | 60            | 26              | 26             | 5      | 11    | 21                            | 20.92                      | 7         |

1. D. R. Vardon, B. K. Sharma, J. Scott, G. Yu, Z. Wang, L. Schideman, Y. Zhang, and T. J. Strathmann, Chemical properties of biocrude oil from the hydrothermal liquefaction of Spirulina algae, swine manure, and digested anaerobic sludge. *Bioresource Technology*, 2011, **102**, 8295-8303.
2. S. Xiu, A. Shahbazi, V. Shirley, and D. Cheng, Hydrothermal pyrolysis of swine manure to bio-oil: Effects of operating parameters on products yield and characterization of bio-oil. *Journal of Analytical and Applied Pyrolysis*, 2010, **88**, 73-79.
3. J. Lu, J. Watson, J. Zeng, H. Li, Z. Zhu, M. Wang, Y. Zhang, and Z. Liu, Biocrude production and heavy metal migration during hydrothermal liquefaction of swine manure. *Process Safety and Environmental Protection*, 2018, **115**, 108-115.
4. D. W. F. Brillman, N. Drabik, and M. Wądrzyk, Hydrothermal co-liquefaction of microalgae, wood, and sugar beet pulp. *Biomass Conversion and Biorefinery*, 2017, **7**, 445-454.
5. H. Feng, B. Zhang, Z. He, S. Wang, O. Salih, and Q. Wang, Study on co-liquefaction of Spirulina and Spartina alterniflora in ethanol-water co-solvent for bio-oil. *Energy*, 2018, **155**, 1093-1101.
6. S. Xiu, A. Shahbazi, V. Shirley, M. R. Mims, and C. W. Wallace, Effectiveness and mechanisms of crude glycerol on the biofuel production from swine manure through hydrothermal pyrolysis. *Journal of Analytical and Applied Pyrolysis*, 2010, **87**, 194-198.
7. W. T. Chen, Y. H. Zhang, J. X. Zhang, L. Schideman, G. Yu, P. Zhang, and M. Minarick, Co-liquefaction of swine manure and mixed-culture algal biomass from a wastewater treatment system to produce bio-crude oil. *Applied Energy*, 2014, **128**, 209-216.
